# Supplementary material
Source: PubMed Central journal article supplement (PMC3791370)

## SUPPLEMENTARY INFORMATION

### Figure S1. PIPKI $\gamma$ is required for migration and lamellipodium formation

(A) MDA-MB-231 breast cancer cells were infected with lentivirus expressing short hairpin (sh) RNAs against either human PIPKI $\gamma$  or scrambled control. Infected cells were selected by a cell sorter (viral vector contains GFP coding sequence). Either parental or virus infected cells maintained in normal culture conditions were photographed under an inverted microscope at 200X magnification. White arrows indicate ruffle-like structures.

(B) Either parental or virus infected cells were placed in the upper chamber of a Transwell and cells were allowed to migrate for 12-16 h towards 10% serum as a chemoattractant in the lower chamber. Cells were fixed and stained with a 0.5% crystal violet (CV) solution. CV-positive cells that had migrated across 3.0  $\mu$ m pores were counted from photographs taken from at least five random fields (bottom). Expression levels of the endogenous proteins were analyzed by immunoblotting of cell lysates with isoform specific PIPKI $\gamma$  antibodies (top).

(C) ShRAN-resistant DsRed-tagged PIPKI $\gamma$  isoforms were stably expressed in shPIPKI $\gamma$ #2 cells. Cells expressing a similar amount of PIPKI $\gamma$  compared to the control cells were isolated using a cell sorter. With these reconstituted cells, serum-induced chemotaxis was measured with a Transwell as described above (top). Protein expression was confirmed by immunoblotting against the indicated molecules (bottom). WT, wild type. KD, kinase dead. Data are shown as mean  $\pm$  SD of four independent experiments.

(D) The reconstituted cells allowed to migrate into a scratch wound were fixed after 3 hours and immunostained with the Arp2/3 complex component ARPC2. Images were taken at 400X magnification and the representative images are shown.

(E) Either control or shPIPKI $\gamma$ #2 cells were grown to confluence. Lawn of cells was scratched and boundaries between cells and cell-free space were photographed at 5, 30,

60, 120, 180 and 240 min after scratching. At least 200 cells were counted for disk-like protrusions. Data are shown as mean  $\pm$  SD of four experiments.

The experiments described above were performed independently at least four times.

### **Figure S2. PIPKI $\gamma$ interacts with IQGAP1 regardless of kinase activity**

(A) Identification of the PIPKI $\gamma$  binding site on IQGAP1. Equal amounts of [ $^{35}$ S]methionine-labeled IQGAP1-N, IQGAP1-(2-764), IQGAP1-(763-864) or IQGAP1-C were incubated with 4  $\mu$ g GST-PIPKI $\gamma$ 1 or GST alone on glutathione beads. Complexes were washed, resolved by SDS-PAGE and processed by autoradiography. An aliquot of [ $^{35}$ S]methionine-labeled TNT product that was not subjected to chromatography was processed in parallel (Input).

(B) Control vector or HA-tagged PIPKI $\gamma$ 1 wild type (WT) or kinase dead (KD) mutant was expressed with in MDA-MB-231 cells and endogenous IQGAP1 proteins were immunoprecipitated with an anti-IQGAP1 antibody. Immunoprecipitates were resolved by SDS-PAGE and the associated PIPKI $\gamma$ 1 was analyzed by immunoblotting with an anti-HA antibody.

(C) HA-PIPKI $\gamma$ 1 was co-transfected with Myc-IQGAP1 WT or S1441S/S1443A mutant in MDA-MB-231 cells for 36 h. Then, cells were serum starved for 12 h before treating with 10% FBS for 30 m. Myc-IQGAP1 WT or mutant was immunoprecipitated with an anti-Myc antibody and the associated PIPKI $\gamma$ 1 was analyzed by immunoblotting with an anti-HA antibody (top). Data are shown as mean  $\pm$  SD of three independent experiments (bottom).

(D) The reconstituted MEFs were used for 5  $\mu$ M lysophosphatidic acid induced cell migration using a Transwell. Data are shown as mean  $\pm$  SD of three independent experiments.

(E) Myc-IQGAP1 was co-transfected with HA-PIPKI $\gamma$ 1 WT or E111L mutant in MDA-MB-

231 cells for 48 h. Cells were harvested and exogenous IQGAP1 was immunoprecipitated with an anti-Myc antibody and the associated PIPKI $\gamma$ 1 was analyzed by immunoblotting with an anti-HA antibody.

(F) MDA-MB-231 cells were transfected with the indicated IQGAP1 proteins or mock control for 48 h. Cells were harvested with a hypotonic buffer and the membrane fraction was separated from the cytosolic fraction by centrifugation. 10  $\mu$ g of each protein was resolved by SDS-PAGE and analyzed by immunoblotting with the indicated antibodies (top). The percentage of protein bound in the pellet relative to total (S+P) was calculated by quantifying the immunoblots (bottom).

The experiments described above were performed independently at least four times.

**Figure S3. IQGAP1 interacts with PIP<sub>2</sub> and sequestration of PIP<sub>2</sub> blocks IQGAP1 targeting to membrane**

(A) 0.01  $\mu$ M of GST-tagged IQGAP1 full length (FL), N- or C-terminal half was incubated with Pip Strips (Eschelon Bioscience) for 1 h at room temperature and bound proteins were detected by immunoblotting with an anti-GST antibody. LPA, lysophosphatidic acid. LPC, lysophosphocholine. PE, phosphatidylethanolamine. PC, phosphatidylcholine. S1P, sphingosine 1-phosphate. PA, phosphatidic acid. PS, phosphatidylserine.

(B) Myc-tagged IQGAP1 wild type or mutants was co-expressed with HA-tagged PIPKI $\gamma$ 1 in HEK293 cells and exogenous IQGAP1 proteins were immunoprecipitated with an anti-Myc antibody. Immunoprecipitates were resolved by SDS-PAGE and the associated PIPKI $\gamma$ 1 was analyzed by immunoblotting with an anti-HA antibody.

(C) IQGAP1 proteins from the reconstituted MEFs were immunoprecipitated with an anti-GFP antibody. Immunoprecipitates were resolved by SDS-PAGE and the associated PIPKI $\gamma$  was analyzed by immunoblotting with an anti-PIPKI $\gamma$  antibody.

(D) Before plating, MDA-MB-231 cells were treated with either vehicle or 1 mM neomycin

(Calbiochem) for 10 min, or transfected with either vector control or GFP-PLC $\delta$ 1-PH for 24 h. Cells were plated on 10 ng/ml collagen I-coated culture dish for 1 h and similar fractionation assay was performed as Fig. 3 A. Equal amount of proteins (10  $\mu$ g each) were resolved by SDS-PAGE and analyzed by immunoblotting with the indicated antibodies.

(E) MDA-MB-231 cells were transfected with Myc-IQ domain alone or mock control for 48 h. Cells were harvested with a hypotonic buffer and the membrane fraction was separated from the cytosolic fraction by centrifugation. 10  $\mu$ g of each protein was resolved by SDS-PAGE and analyzed by immunoblotting with the indicated antibodies (top). The percentage of protein bound in the pellet relative to total (S+P) was calculated by quantifying the immunoblots (bottom). Data are shown as mean  $\pm$  SD of three independent experiments.

(F) Cell lysates from reconstituted MEFs were used for immunoprecipitating endogenous N-WASP. Immunoprecipitates were resolved by SDS-PAGE and the associated IQGAP1 was analyzed by immunoblotting with an anti-IQGAP1 antibody.

All the experiments described above were performed independently at least three times.

**Figure S4. PIPKI $\gamma$ - and PIP $_2$ -binding of IQGAP1 are required for directionally persistent migration**

(A) The reconstituted MEFs were plated on gelatin gel for 3 h before recording using time-lapse microscopy at 400X. To locate cells expressing GFP-positive IQGAP1 proteins, cells were first photographed under a fluorescent channel. Immediately after, cells were imaged every 5 min for 3 h to generate the movies shown in videos 1-3.

(B) MDA-MB-231 cells were transfected with mock control or increasing amount of GFP-PLC $\delta$ 1-PH DNA for 4h. Cells plated on collagen I for 1h were fixed and immunostained with endogenous IQGAP1. Cells were photographed at 400X magnification.

All the experiments described above were performed independently at least three times.

**Figure S5. Enhancement of actin polymerization is specific to PI4,5P<sub>2</sub>**

(A and B) Actin polymerization (1.5 μM of pyrene-conjugated G-actin, 12.5 nM of Arp2/3 complex and 40 nM of N-WASP-ΔB) in the presence of the indicated combinations of GST-IQGAP1-C (50 nM) or 5% phosphoinositide-liposomes (2 μM).

(C) 0.1 μM of His-C2 WT or AA3 mutant were incubated with 1 μM of GST-C1 immobilized on glutathione beads in the absence or presence of the indicated phosphoinositide-liposomes for 10 min. Liposome-bound proteins were detected by immunoblotting with an anti-His antibody.

(D) Actin polymerization was performed in the presence of 50 nM GST-IQGAP1-C with the indicated liposomes.

All the experiments described above were performed independently at least three times.

**Supplementary Movie 1. Migration of wild type IQGAP1-reconstituted *Iqgap1*<sup>-/-</sup> MEFs**

*Iqgap1* KO MEFs were reconstituted with WT IQGAP1. Then, reconstituted MEFs were plated on gelatin gel for 3 h before recording using time-lapse microscopy. Images were collected every 5 min for 3 h at 400X magnification and combined into a time-lapse movie.

**Supplementary Movie 2. Migration of ΔIQ-reconstituted *Iqgap1*<sup>-/-</sup> MEFs**

*Iqgap1* KO MEFs were reconstituted with the ΔIQ mutant IQGAP1. Then, reconstituted MEFs were plated on gelatin gel for 3 h before recording using time-lapse microscopy. Images were collected every 5 min for 3 h at 400X magnification and combined into a time-lapse movie.

### **Supplementary Movie 3. Migration of AA3-reconstituted *Iqgap1*<sup>-/-</sup> MEFs**

*Iqgap1* KO MEFs were reconstituted with the AA3 mutant IQGAP1. Then, reconstituted MEFs were plated on gelatin gel for 3 h before recording using time-lapse microscopy. Images were collected every 5 min for 3 h at 400X magnification and combined into a time-lapse movie.

Figure S1

**A**

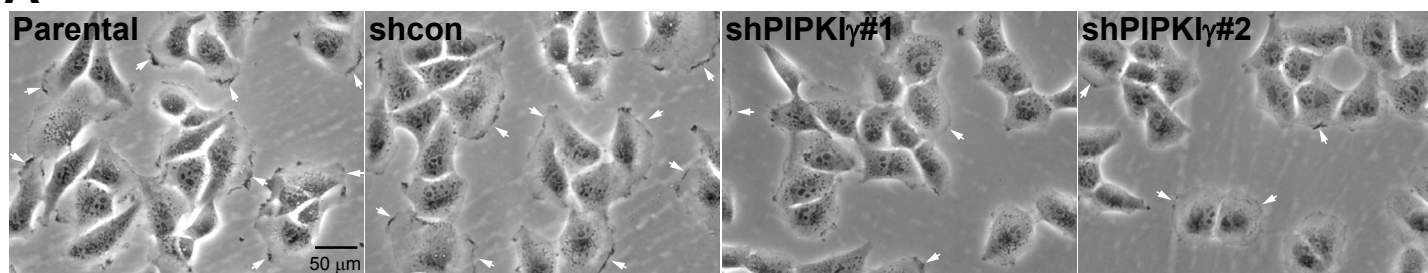

**B**

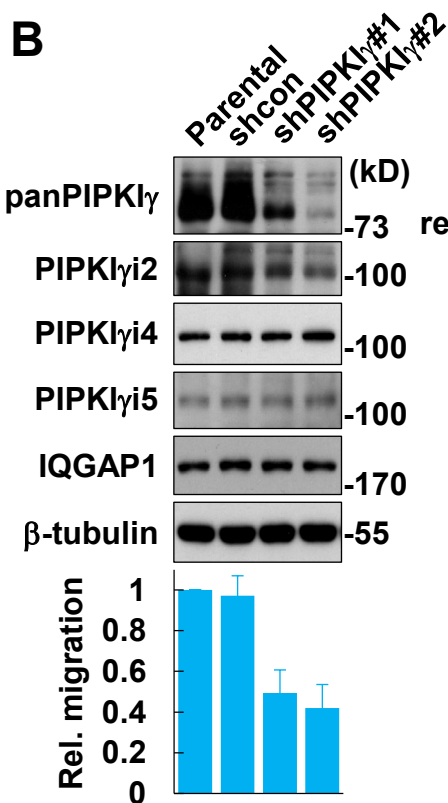

**C**

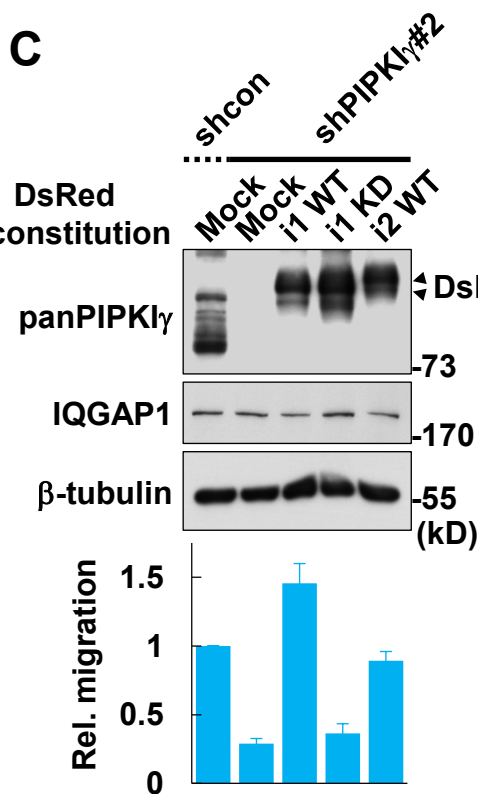

**E**

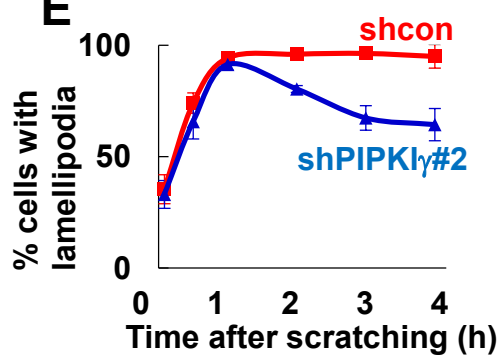

**D**

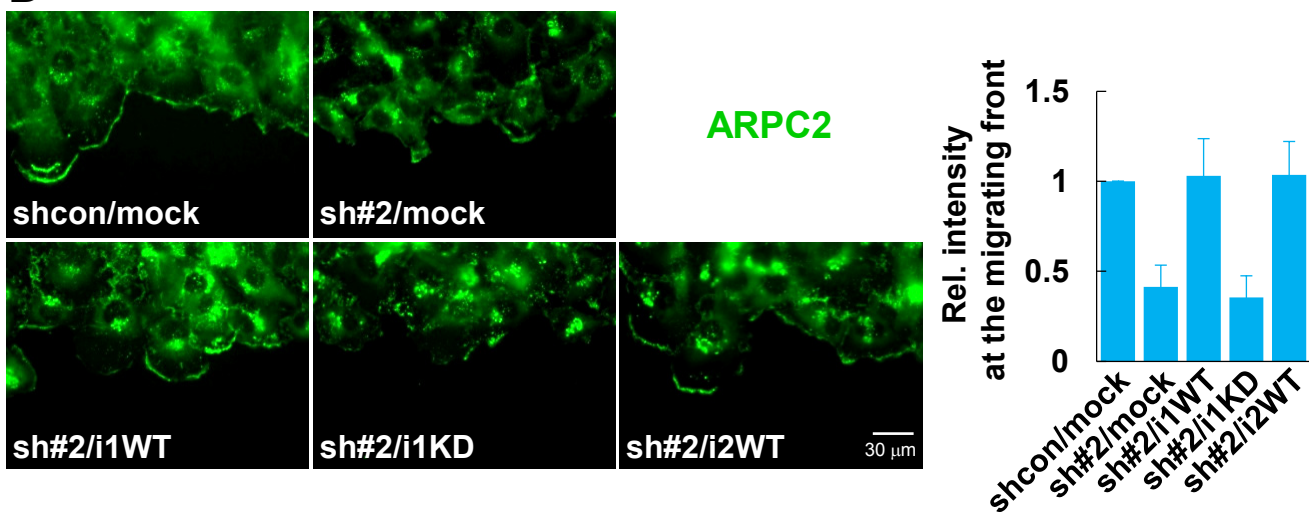

Figure S2

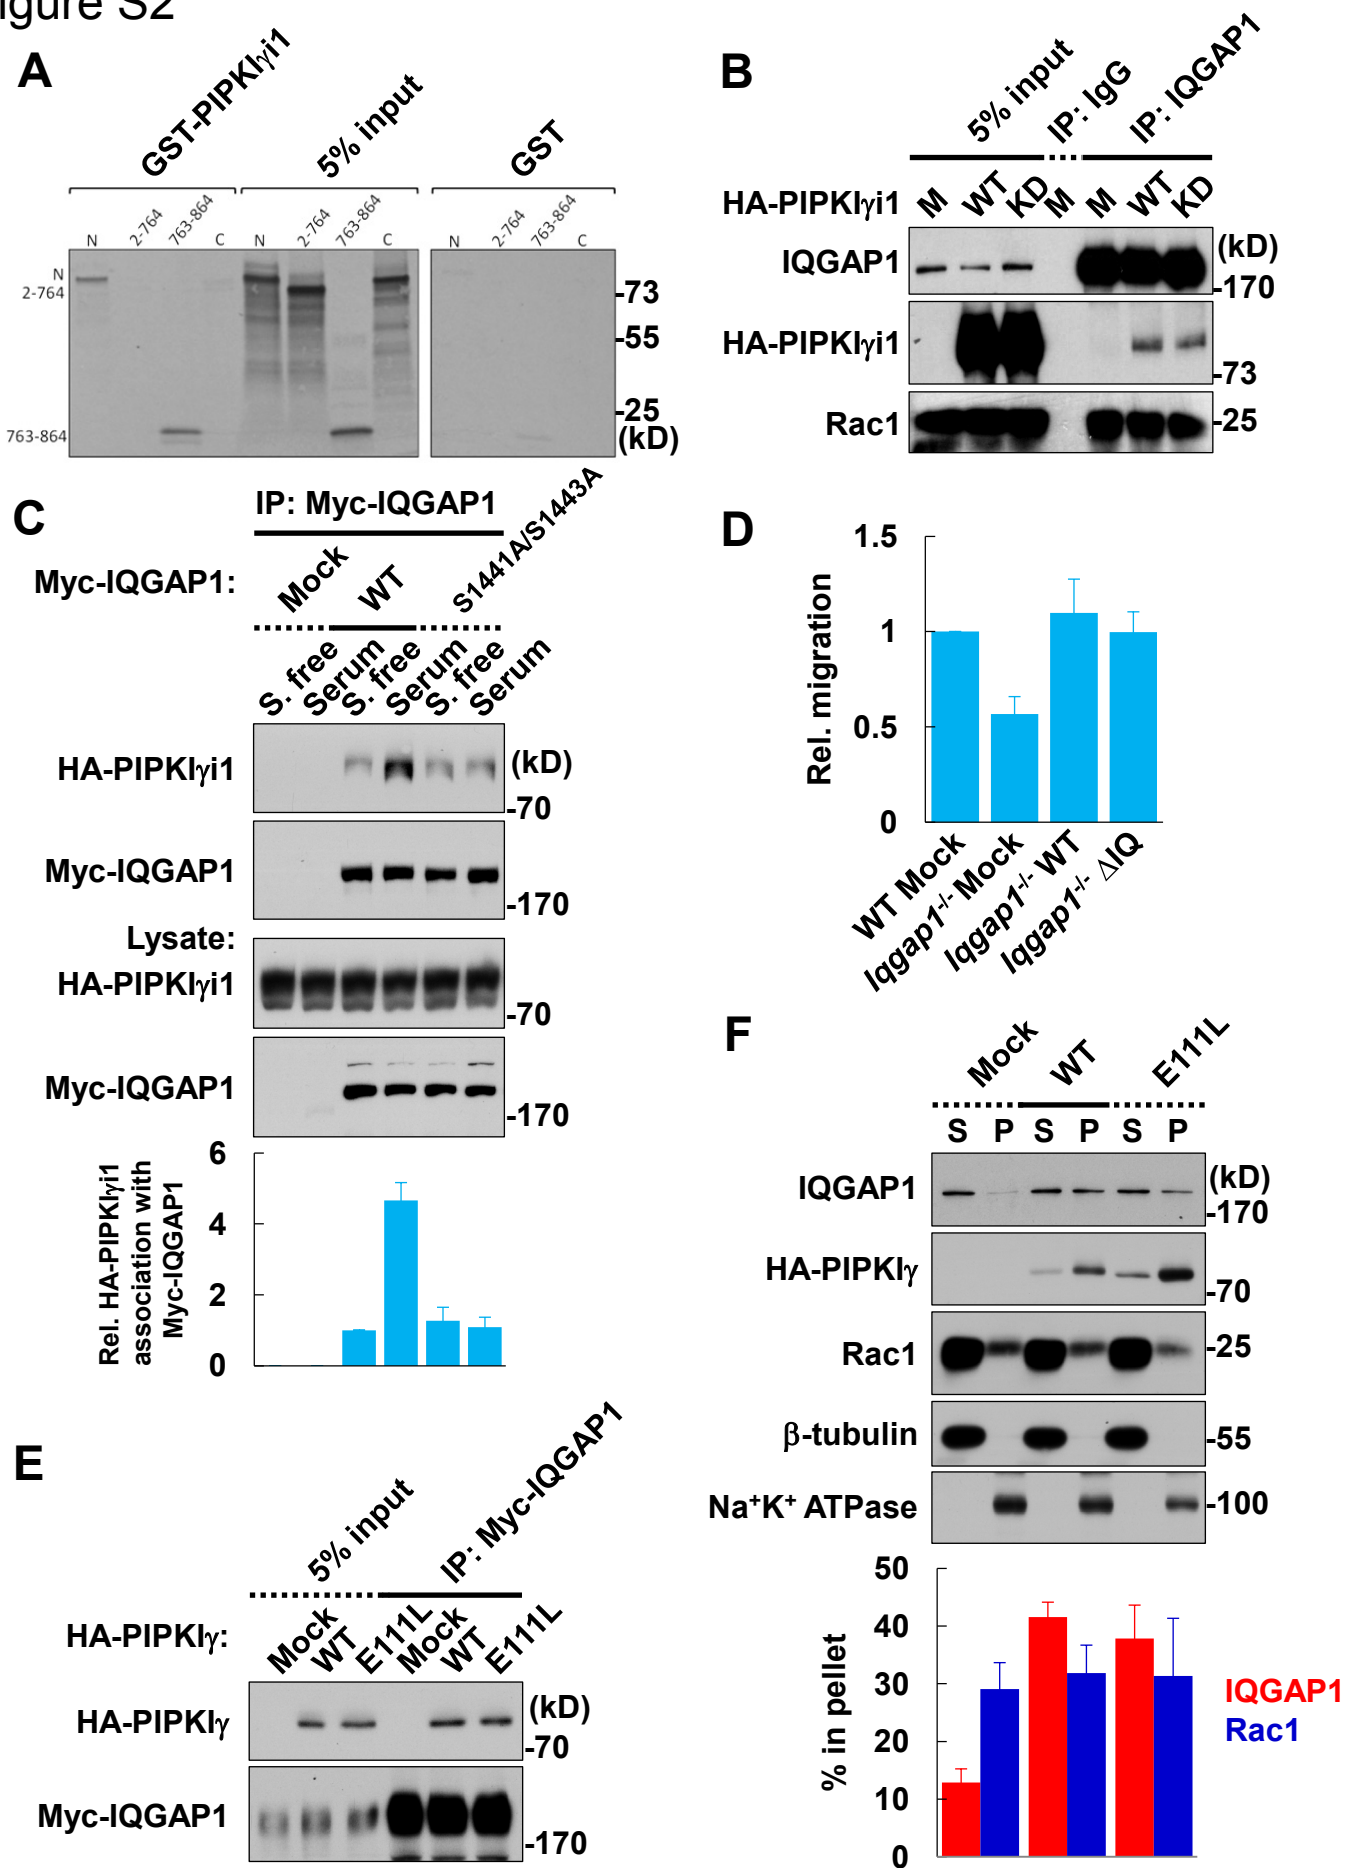



Figure S3

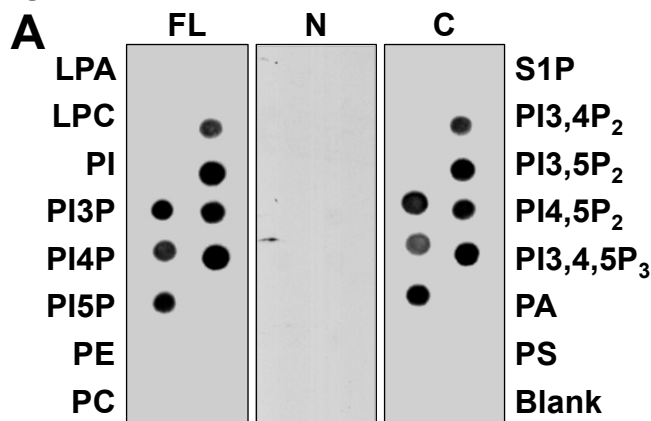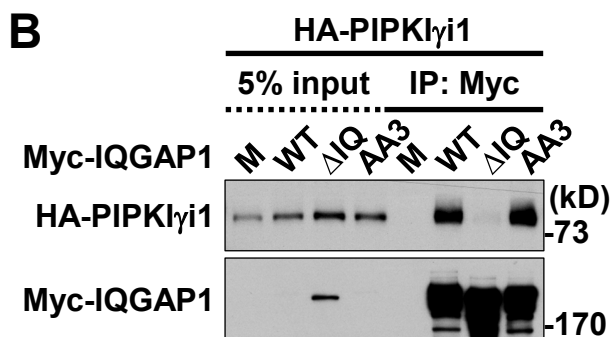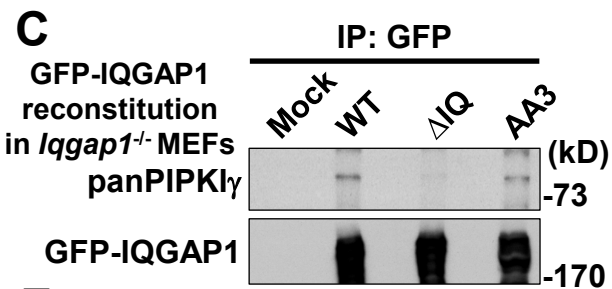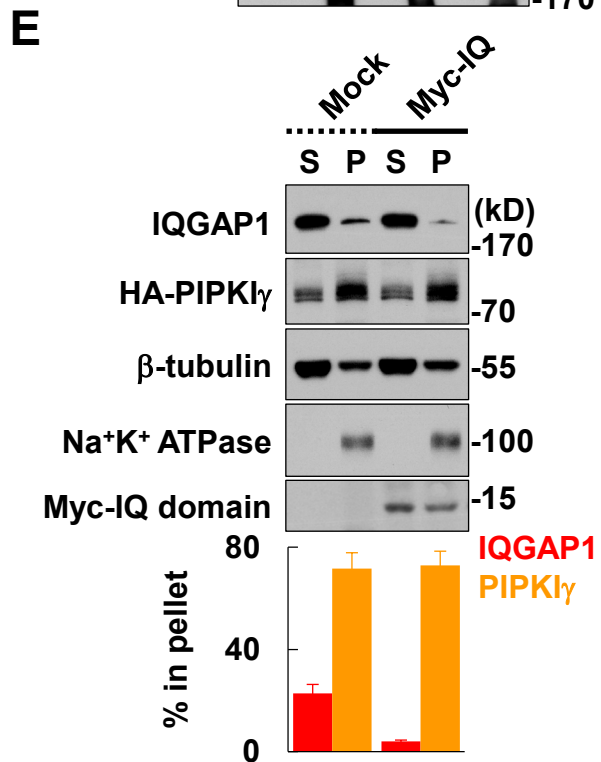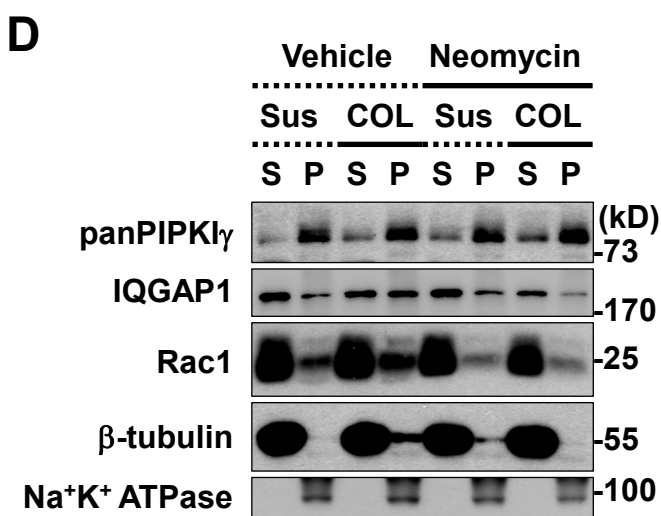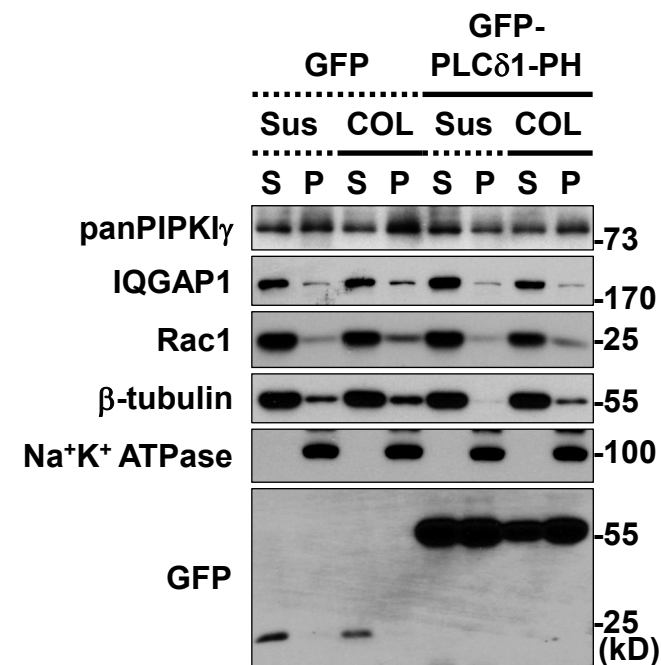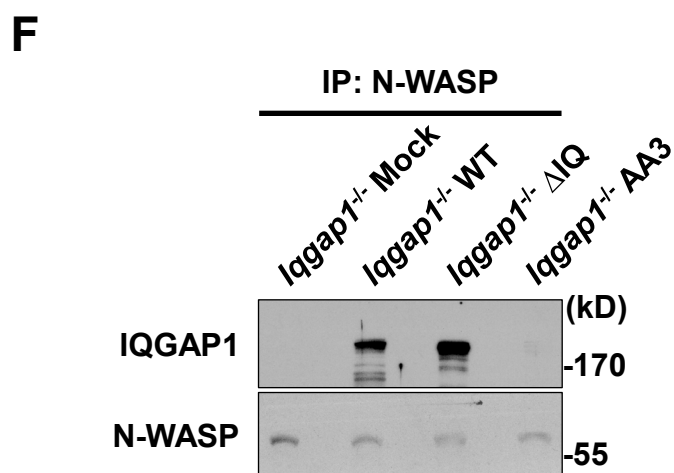

Figure S4

A

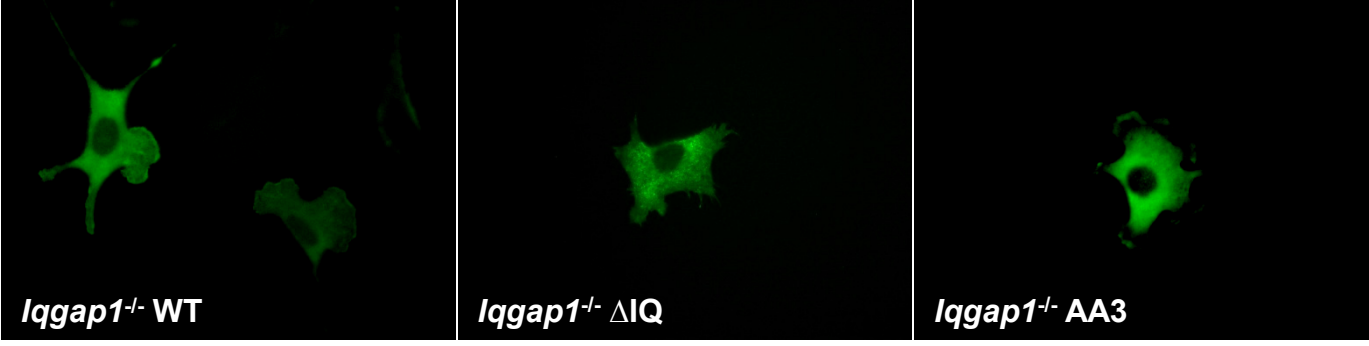

B

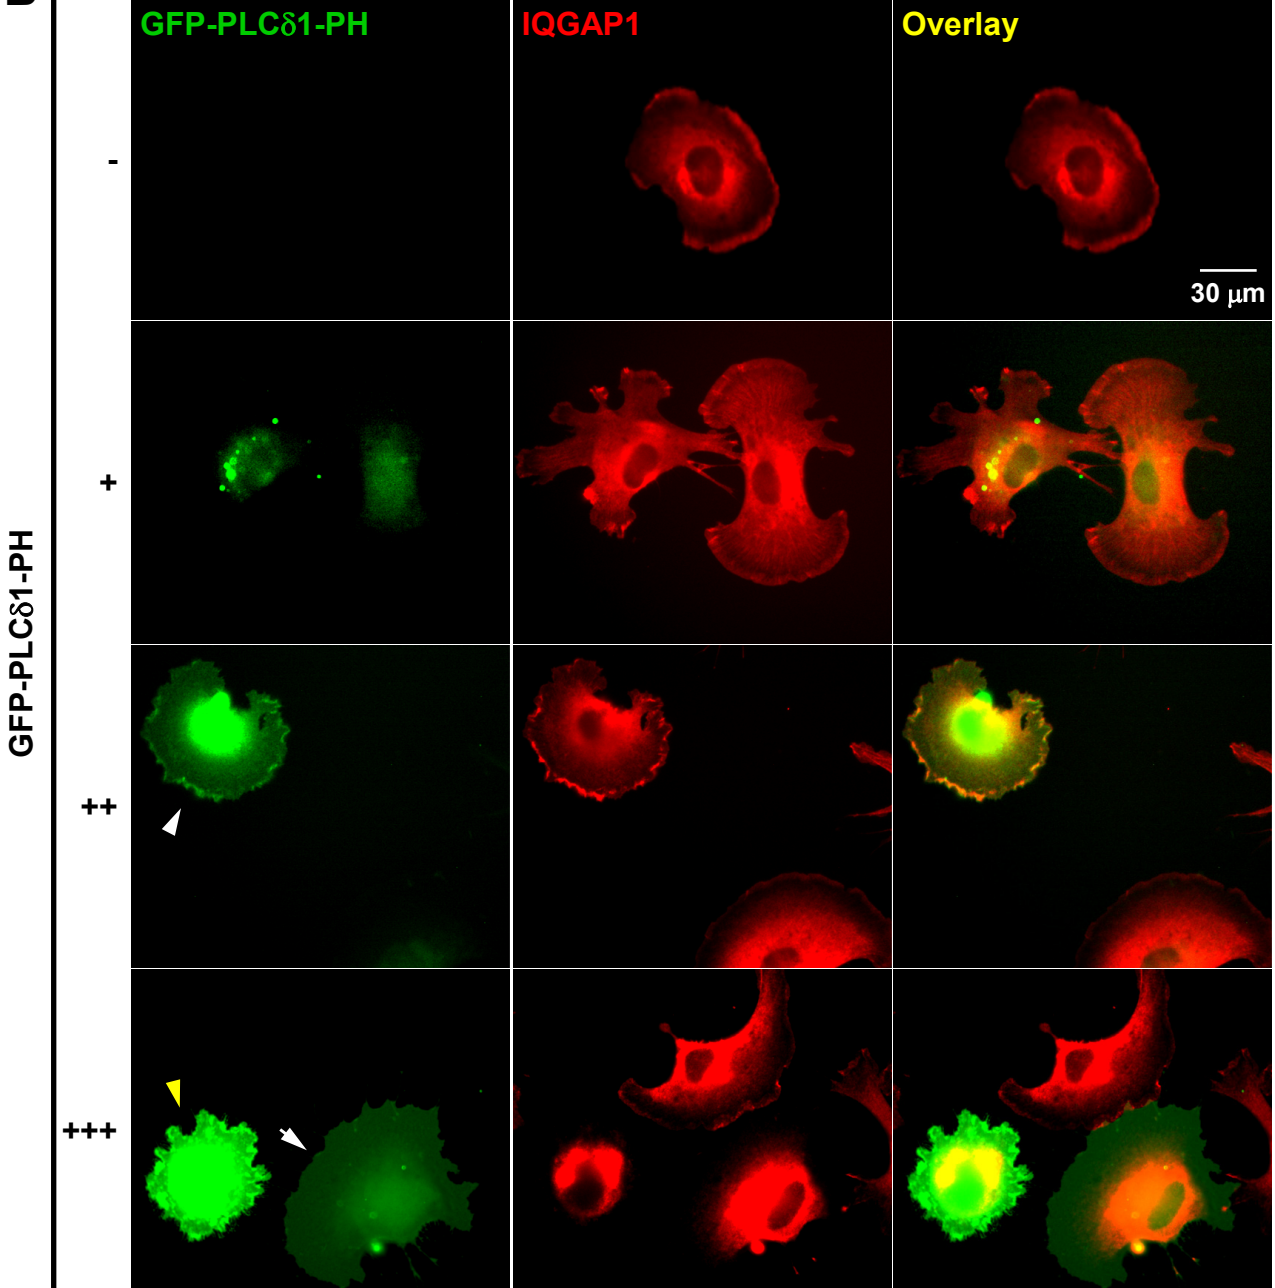

Figure S5

**A**

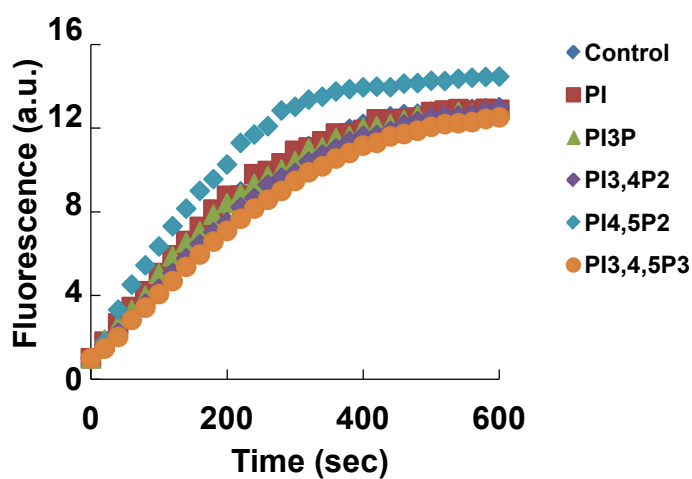

**B**

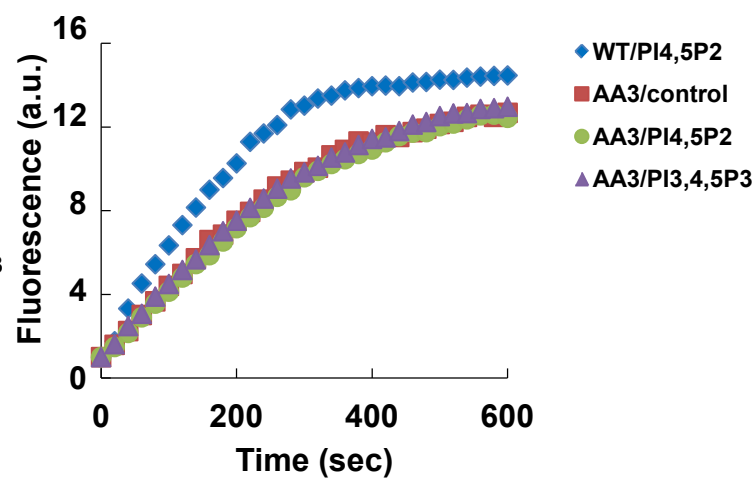

**C**

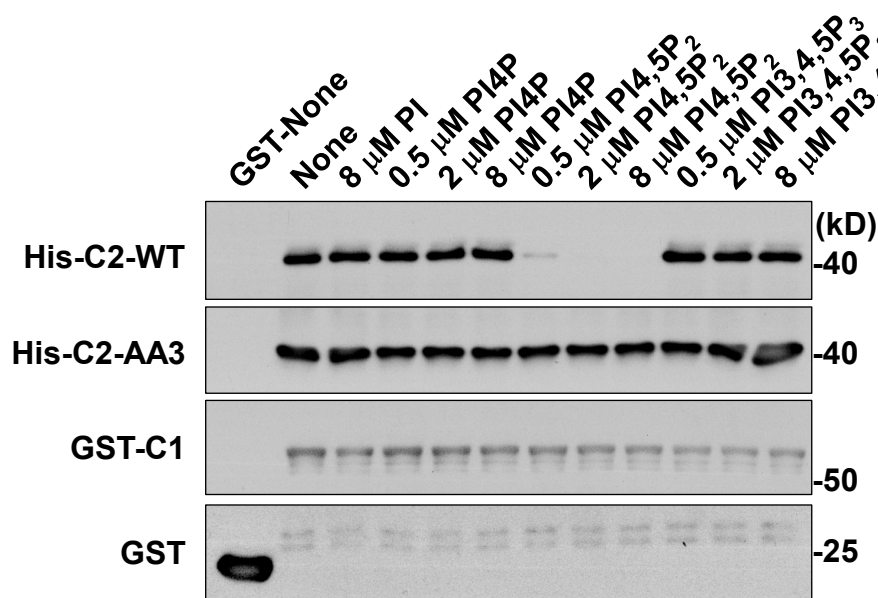

**D**

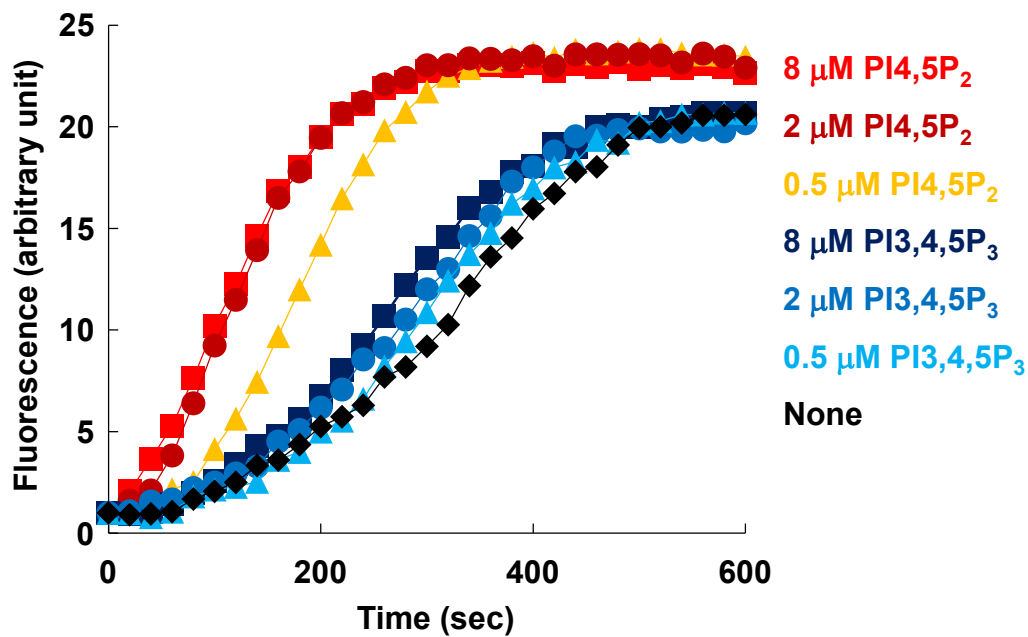

Supplement: emboj2013191s1.pdf [file emboj2013191s1.pdf]
