# Supplementary material
Source: PubMed Central journal article supplement (PMC3791370)

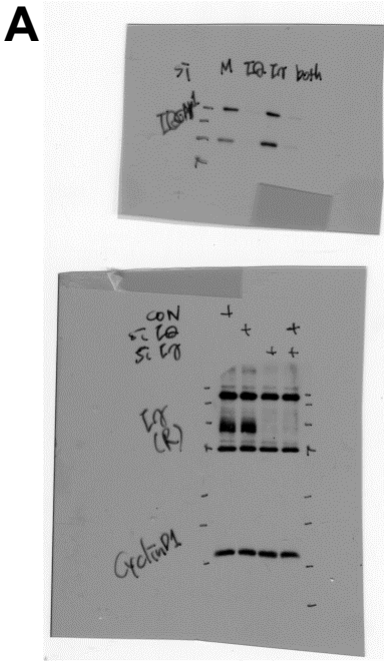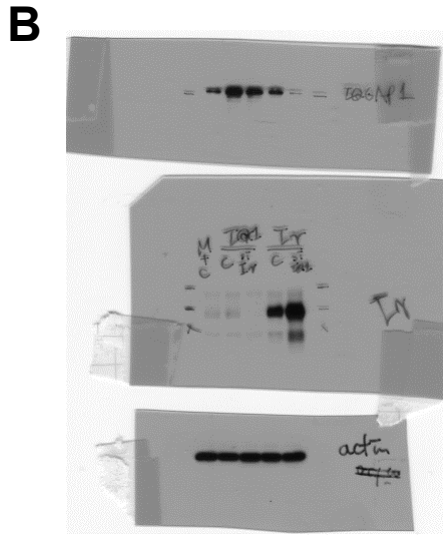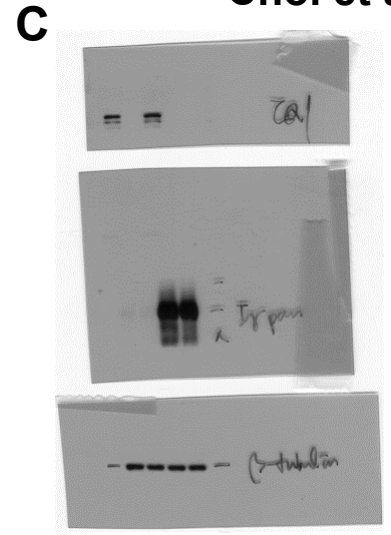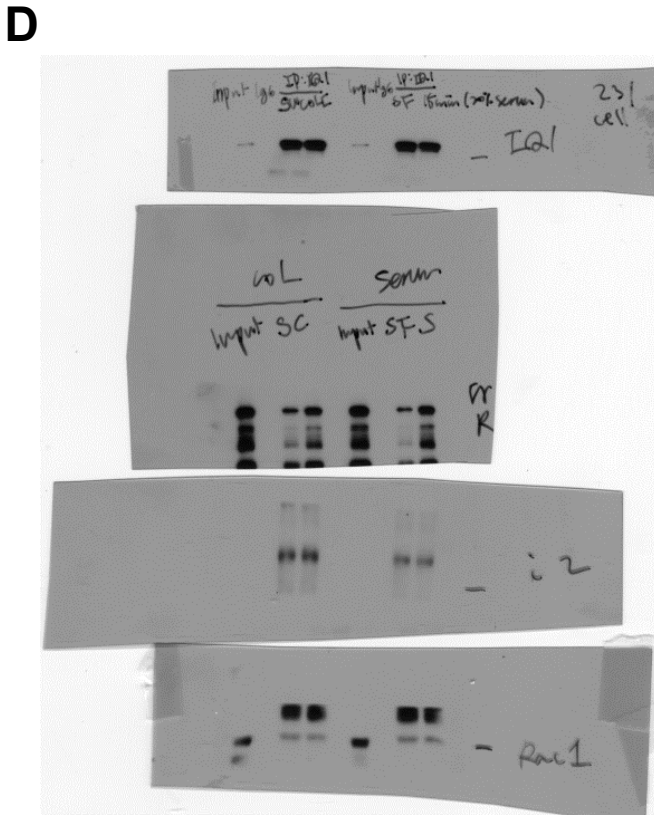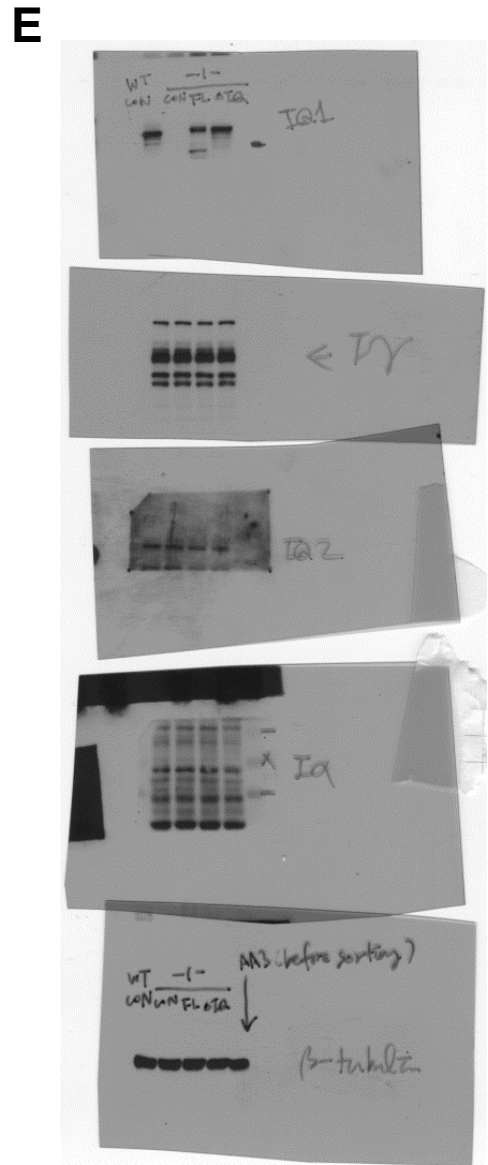

Supplement: emboj2013191df2.pdf [file emboj2013191df2.pdf]

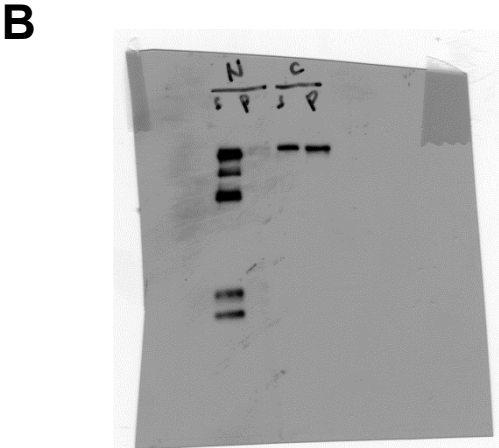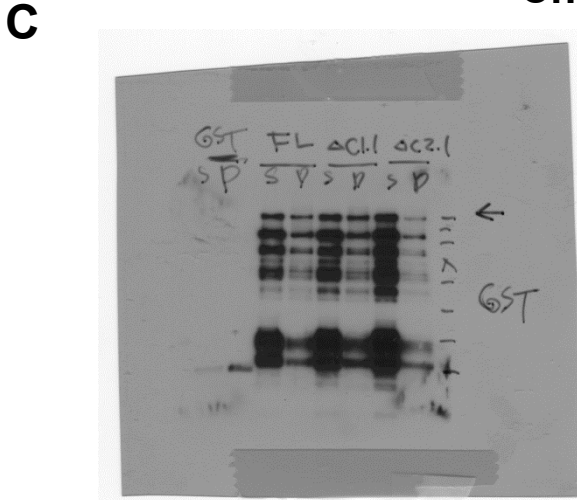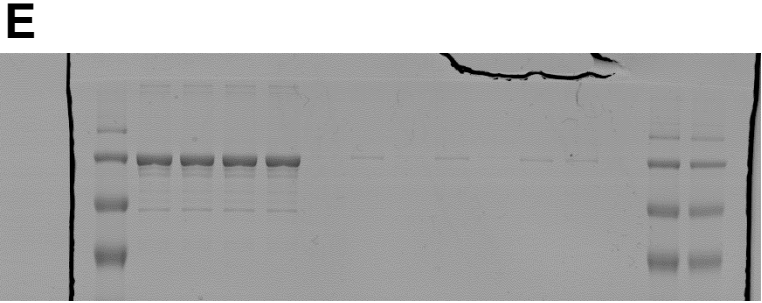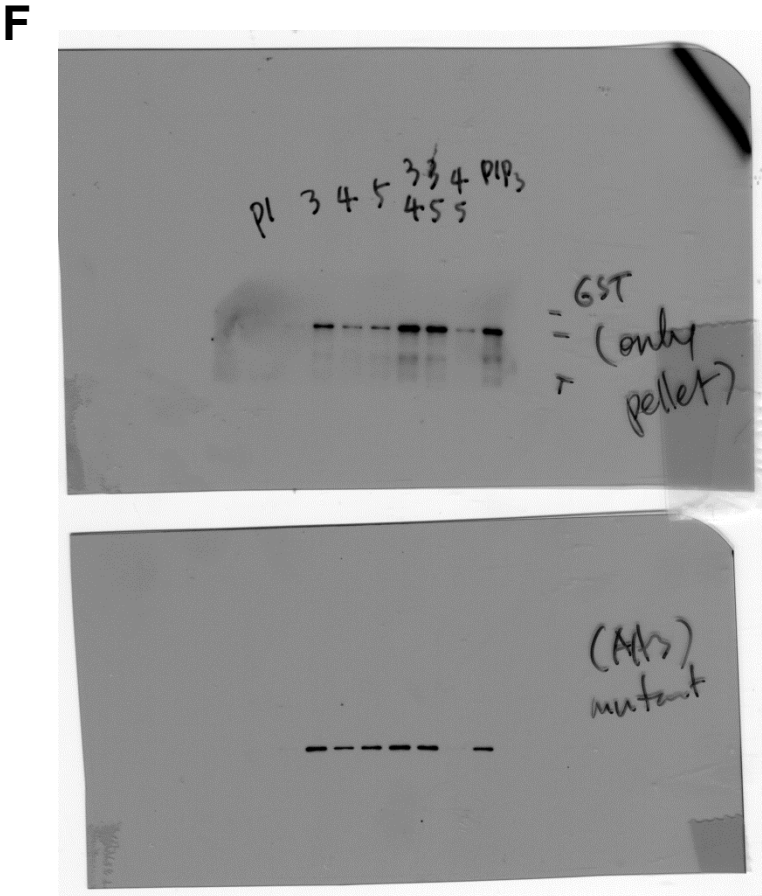

Supplement: emboj2013191df4.pdf [file emboj2013191df4.pdf]

A

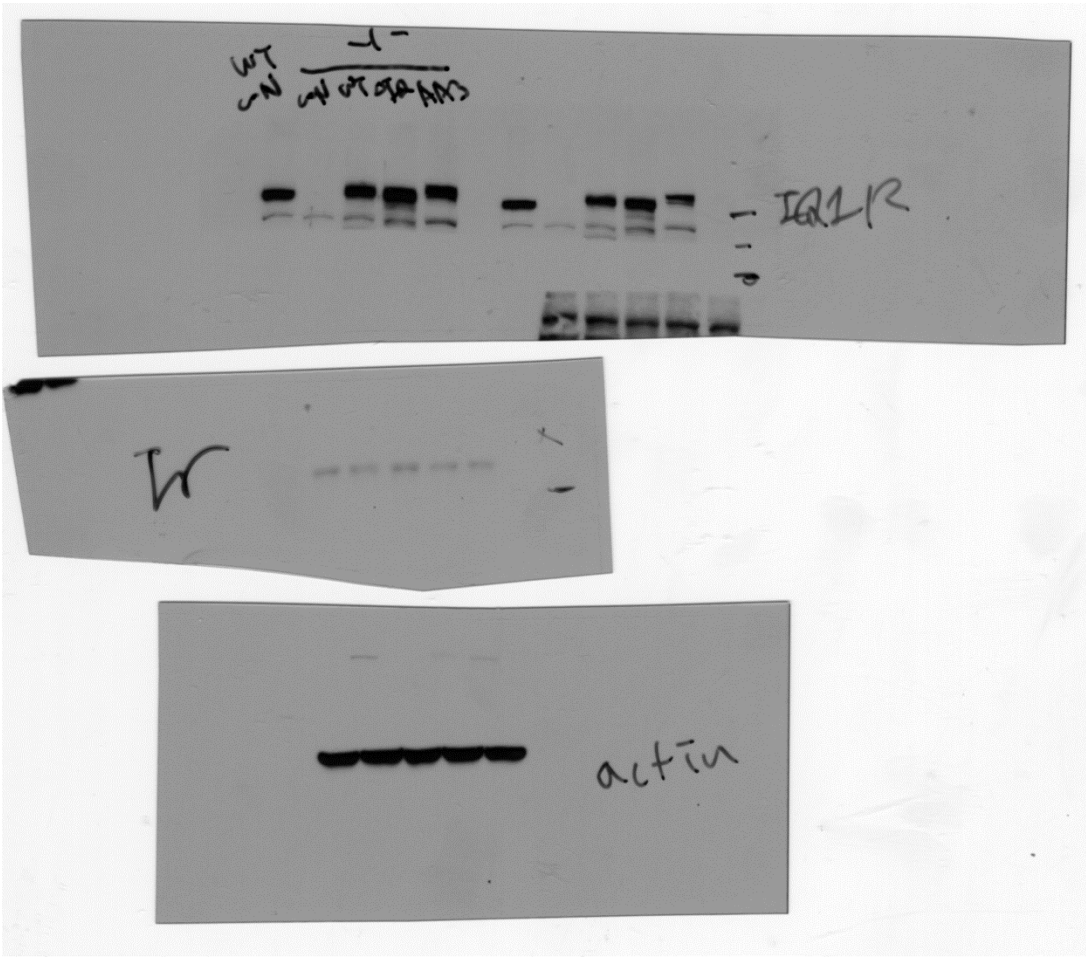

Supplement: emboj2013191df5.pdf [file emboj2013191df5.pdf]

B

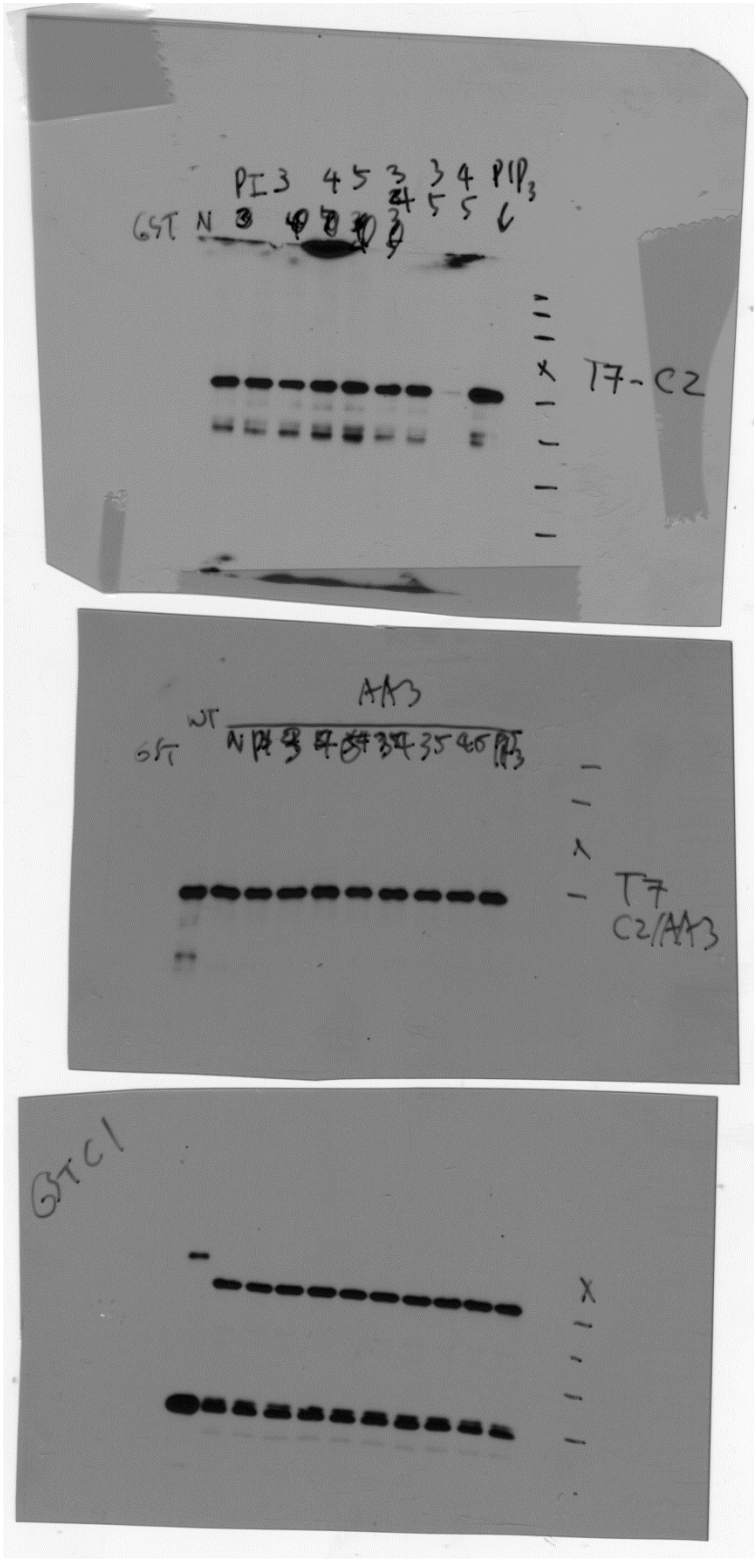

Supplement: emboj2013191df6.pdf [file emboj2013191df6.pdf]
